# Supplementary material for: Preclinical to Clinical Translation of Antibody Drug Conjugates Using a Quantitative Systems Pharmacology (QSP) Model: A Case Study with Disitamab Vedotin
Source: Research Square preprint supplement (doi:10.21203/rs.3.rs-4543078/v1), 2024-07-15

Supporting Information

Mathematical representation of the model as differential equation system

Plasma PK and tumor distribution

Tumor extracellular space

Cellular disposition

Tumor growth inhibition

Figure S1 a. The affinity profile of Disitamab Vedotin in NCI-N87 cells. b. The dissociation profile of Disitamab Vedotin in NCI-N87 cells. c. The internalization profile of Disitamab Vedotin in NCI-N87 cells.


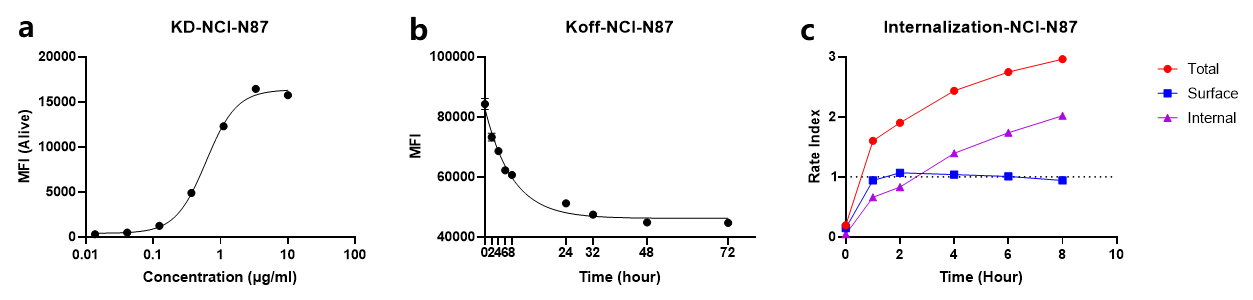

Supplement: Supplementary file 1 [file 41bc35c9bebdbd52be37c695.docx]
